# Supplementary material for: Synthetic studies on CP-225,917 and CP-263,114: concise synthesis of the bicyclic core using an intramolecular Mukaiyama aldol reactionElectronic supplementary information (ESI) available: crystal data for 13a. See http://www.rsc.org/suppdata/p1/b2/b202752f/
Source: Royal Society of Chemistry journal article supplement (doi:10.1039/b202752f), 2002-05-01
Supplement: b202752f.doc [file b202752f.doc]

Supplementary data

This structure determination was performed by Dr. A.J. Blake, Dept. of Chemistry, University of Nottingham, whom we thank.

**Crystal data for 13a** (numbering as depicted in ORTEP diagram): C17H24O6, *M* = 324.36, monoclinic, *a* = 13.582(7), *b* = 11.418(6), *c* = 11.111(7) Å, β = 105.71(6)O, *U* = 1659(2) Å3, *T* = 220(2) K, space group *P*21/*c*, (No. 14), *Z* = 4, *D*c = 1.299 g cm-3, µ(Mo-*K*α) = 0.098 mm‑1, 2161 unique reflections (*R*int 0.136) measured and used in all calculations. Final *R*1 [1438 *F* > 4σ(*F*)] = 0.0638 and *wR*(all *F*2) was 0.139. The methyl group centred on C11 is disordered over two sites with occupancies 0.785(12) and 0.215(12): both C atoms were refined with isotropic displacement parameters and the O-C(methyl) distances were subject to a similarity restraint.

Poor diffraction characterised by the clearly split diffraction profiles seen at 150 K was partly ameliorated by annealing and data collection at 220 K. However, the profile shape was still poor and relatively broad. This, combined with the general weakness of diffraction, meant that it was not worthwhile to collect data beyond 2theta of 45o.

There is disorder of the methyl group centred on C11, with the major site occupancy being 0.785(12) and the minor 0.215(12). Both C atoms were refined with isotropic displacement parameters and the O-C(methyl) distances were subject to a similarity restraint. The methyl group centred on C15 showed incipient disorder but it was decided to model this as dynamic rather than static disorder.
